# Supplementary material for: Determination of Crucial Immunogenic Epitopes in Major Peanut Allergy Protein, Ara h2, via Novel Nanoallergen Platform
Source: PubMed Central journal article supplement (PMC5479826; doi:10.1038/s41598-017-04268-6), 2017-06-21
Supplement: 41598_2017_4268_MOESM1_ESM.pdf [file 41598_2017_4268_MOESM1_ESM.pdf]

**Supplementary Information for:  
Determination of Crucial Immunogenic Epitopes in Major Peanut Allergy Protein, Ara h2, via Novel  
Nanoallergen Platform**

Peter E. Deak<sup>†</sup>, Maura R. Vrabel<sup>†</sup>, Tanyel Kiziltepe<sup>†,‡</sup> and Basar Bilgicer<sup>†,‡,§,·</sup>

<sup>†</sup>Department of Chemical and Biomolecular Engineering, University of Notre Dame, Notre Dame IN 46556

<sup>‡</sup>Advanced Diagnostics and Therapeutics, University of Notre Dame, Notre Dame IN 46556

<sup>§</sup>Department of Chemistry and Biochemistry, University of Notre Dame, Notre Dame IN 46556

<sup>·</sup> Correspondence:

171 Fitzpatrick Hall  
Notre Dame, IN 46556-5637  
Tel: 1 574 631 1429  
fax: 1 574 631 8366  
e-mail: [bbilgicer@nd.edu](mailto:bbilgicer@nd.edu)

A.

### Ara h2 Protein

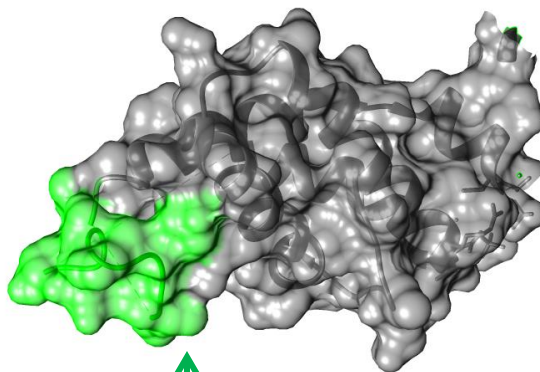

### Ara h2 Epitope

ERDPYSP<sup>OH</sup>SQDPYSP<sup>OH</sup>S

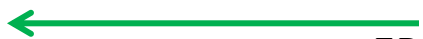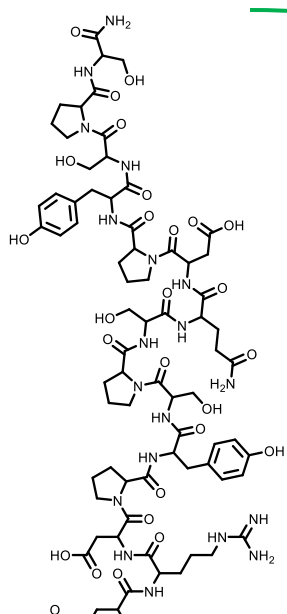

EG<sub>2</sub>

Lys (3x)

EG<sub>6</sub> (3x)

Palmitic Acid (C16)

Figure S-1. Schematic of epitope-lipid conjugates . A linear peptide sequence of the peanut protein Ara h2 (residues 79-91) was attached to a lipid using the schematic given. The epitope (shown in green) is shown in context with the native Ara h2 protein (PDB: 3OB4). Note that the schematic was used for all other epitope-lipids.

Table S-1. Listing of Ara h 2 IgE binding epitopes-lipid conjugates.

| Epitope-Lipid | Exact Mass (g/mol) | Purity (%) | Immuno-reactivity (Serum 1) |
|---------------|--------------------|------------|-----------------------------|
| 1             | 4330.64            | >95%       | None                        |
| 2             | 4094.33            | >95%       | High                        |
| 3             | 3425.16            | >95%       | Low                         |
| 4             | 3498.23            | >95%       | None                        |
| 5             | 3563.21            | >95%       | Low                         |
| 6             | 4563.78            | >95%       | Low                         |
| 7             | 3182.02            | >95%       | Low                         |
| 8             | 3820.28            | >95%       | None                        |

Table S-2. Listing of patient sera and their ImmunoCAP results for peanuts.

| Serum Number | Peanut IgE (kU/L) |
|--------------|-------------------|
| 1            | 84.4              |
| 2            | 99.3              |
| 3            | 50                |
| 4            | 124.5             |

Table S-3- EC<sub>50</sub> values and maximum degranulation values for Ara h 2 and 2 % loaded Ara h 2 epitope nanoallergens

| Serum #   | 1                     |       |        |       | 2                     |     |        |       | 3                     |       |        |       | 4                     |       |        |       |
|-----------|-----------------------|-------|--------|-------|-----------------------|-----|--------|-------|-----------------------|-------|--------|-------|-----------------------|-------|--------|-------|
| Peptide # | EC <sub>50</sub> (pM) | Error | Max(%) | Error | EC <sub>50</sub> (pM) |     | Max(%) | Error | EC <sub>50</sub> (pM) | Error | Max(%) | Error | EC <sub>50</sub> (pM) | Error | Max(%) | Error |
| Ara h2    | 104                   | 20    | 35     | 2.1   | 33                    | 20  | 35     | 3.5   | 115                   | 50    | 52     | 5     | 52                    | 12    | 55     | 6     |
| 1         | >5000                 |       | 0      |       | 1400                  | 107 | 25.6   | 0.9   | 1340                  | 85    | 21.5   | 0.7   | 430                   | 35    | 25     | 0.5   |
| 2         | 3.6                   | 1.2   | 24     | 1.7   | >5000                 |     | 24     | 1.2   | 91                    | 17    | 8.9    | 0.5   | 5.9                   | 6.6   | 21     | 3.3   |
| 3         | 1000                  | 110   | 80.8   | 3.4   | 2200                  | 390 | 43     | 5.6   | >5000                 |       | 46     | 2.1   | 1512                  | 260   | 37.2   | 4.1   |
| 5         | >2500                 |       | 79     | 4.9   | 1200                  | 170 | 31     | 2.6   | 870                   | 150   | 25.1   | 2.1   | 600                   | 110   | 37     | 2.5   |
| 6         | >2500                 |       | 36.1   | 2.7   | 1670                  | 220 | 34.9   | 0.9   | 2080                  | 170   | 36.6   | 1.9   | 760                   | 190   | 46.4   | 4.1   |
| 7         | >2500                 |       | 21.7   | 0.8   | >2500                 |     | 15.3   | 1.2   | >5000                 |       | 10.1   | 2.3   | >2500                 |       | 20.4   | 3.6   |

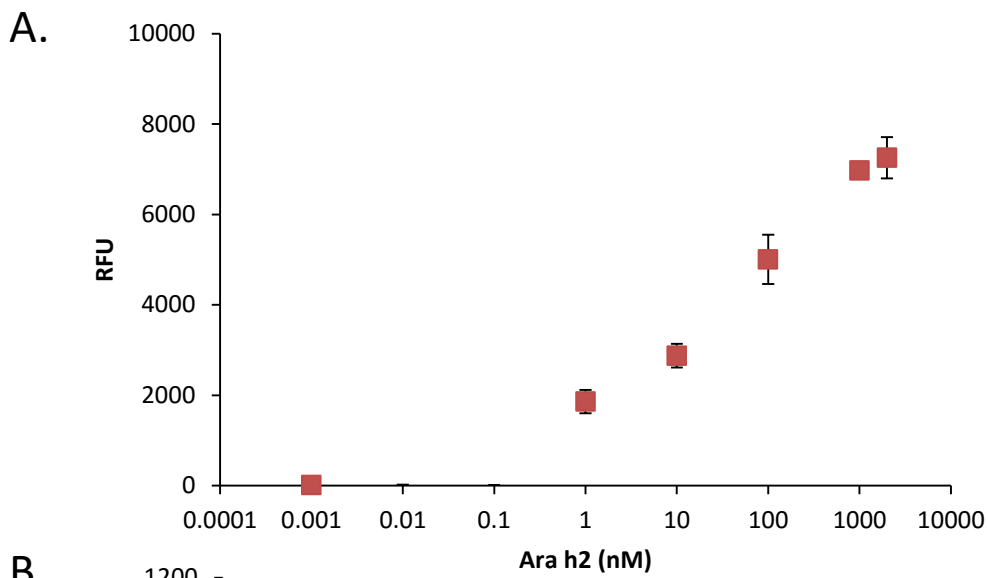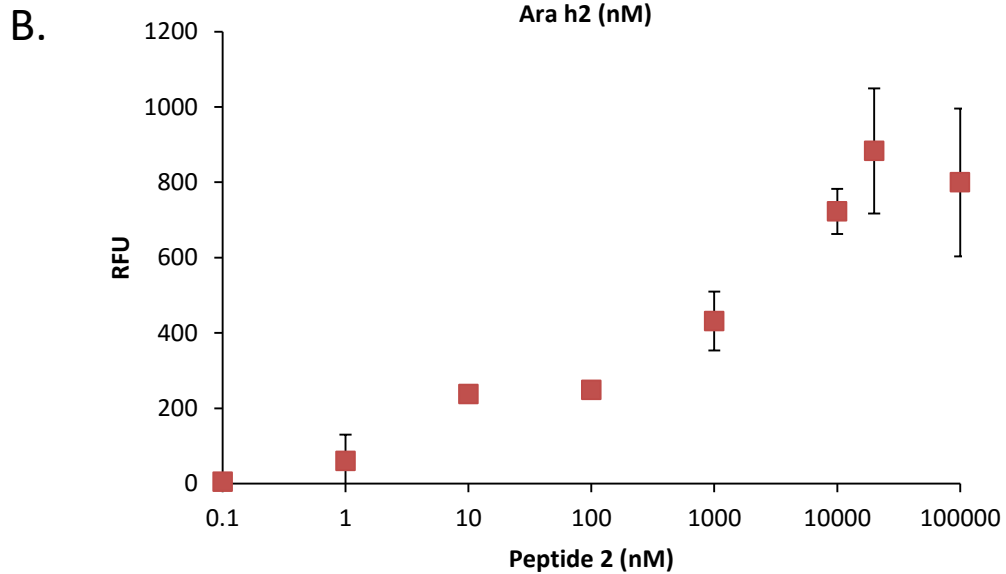

Figure S-2. ELISA binding assay with patient sera. (A) Patient serum 1 was added to a 96 well plate coated with anti-IgE IgG, washed and then either Ara h 2-Biotin or (B) FITC-tagged epitope 2 peptide and the binding was observed using ELISA. Ara h2-  $EC_{50} = 40 \pm 27$  nM; Epitope 2-  $EC_{50} = 465 \pm 200$  nM

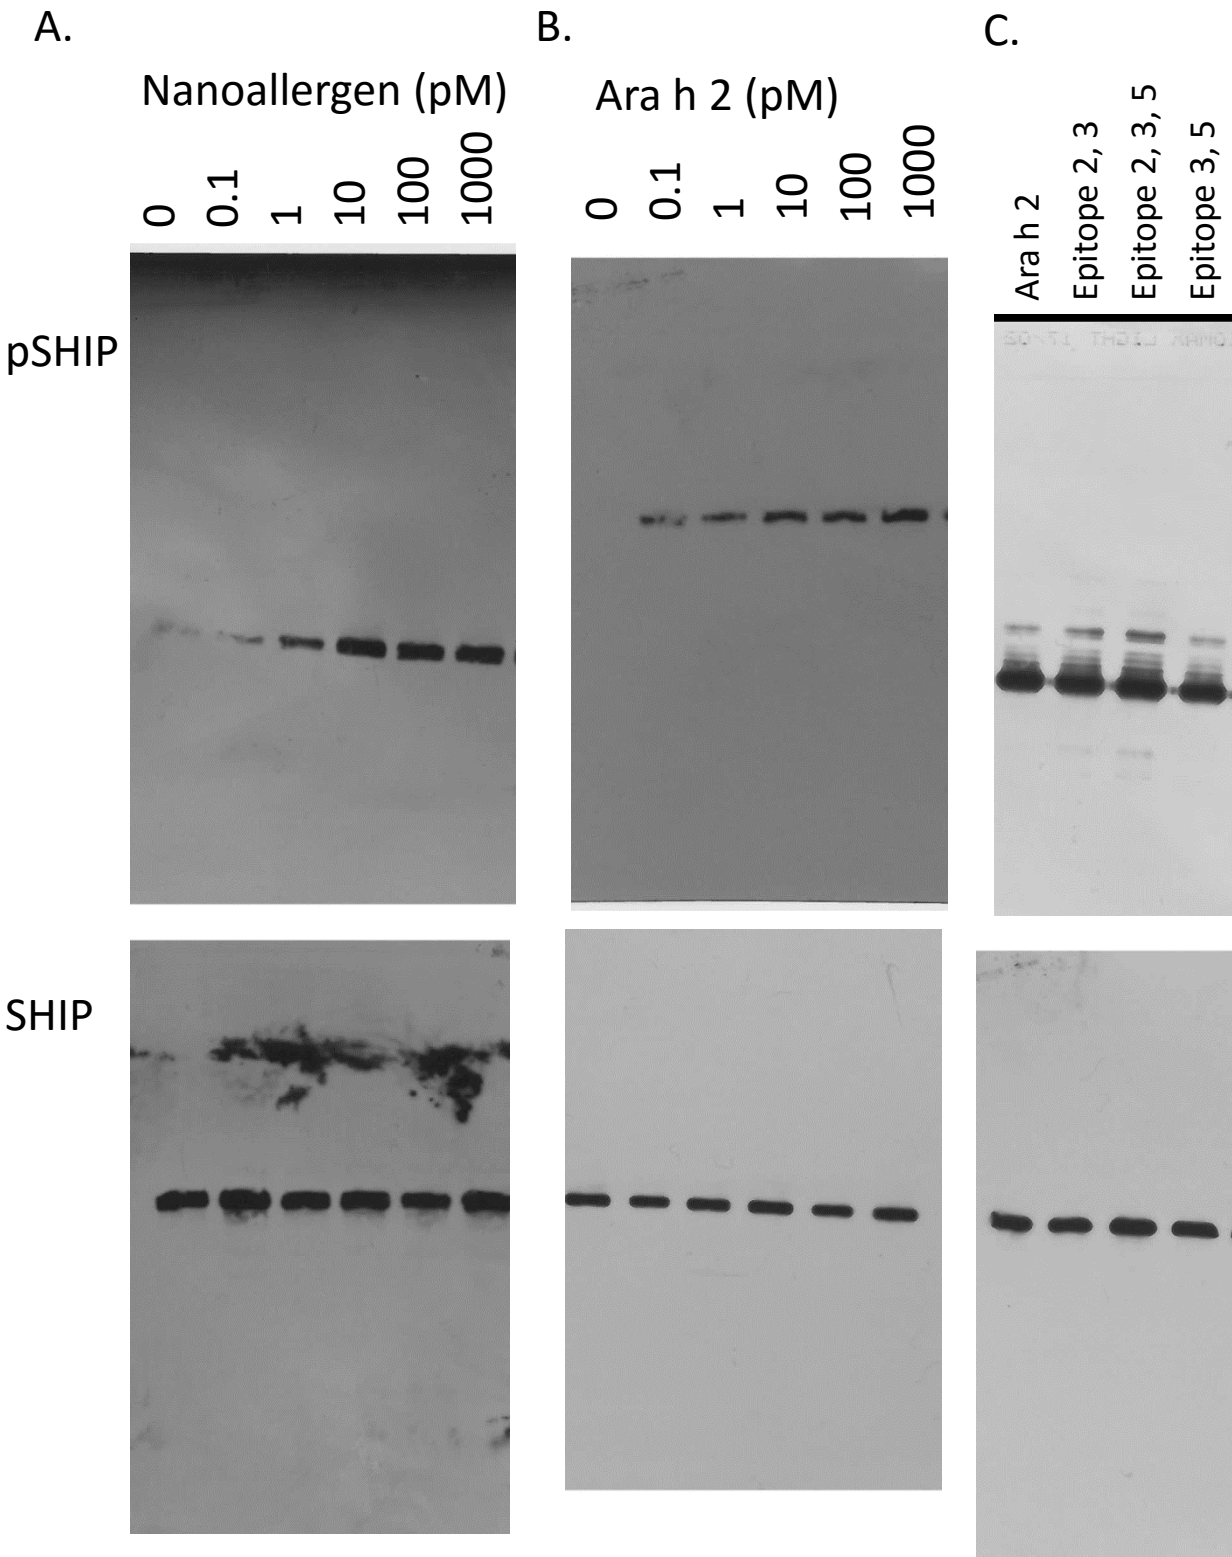

Figure S-3. Full length SHIP blots used in this study. pSHIP shown on top, SHIP at bottom. Note that SHIP-1 protein (MW=133 kDa) appeared between 150 and 100 kDa markers for all gels, with a slight increase in MW for pSHIP. (A). 2% epitope 2 presenting nanoallergen in Figure 3C, (B) Ara h 2 protein in Figure 3C, (C) multiple nanoallergen formulation and Ara h 2 control in Figure 6. Note bands appearing below pSHIP as possible antibody targeting of SHIP or contamination.

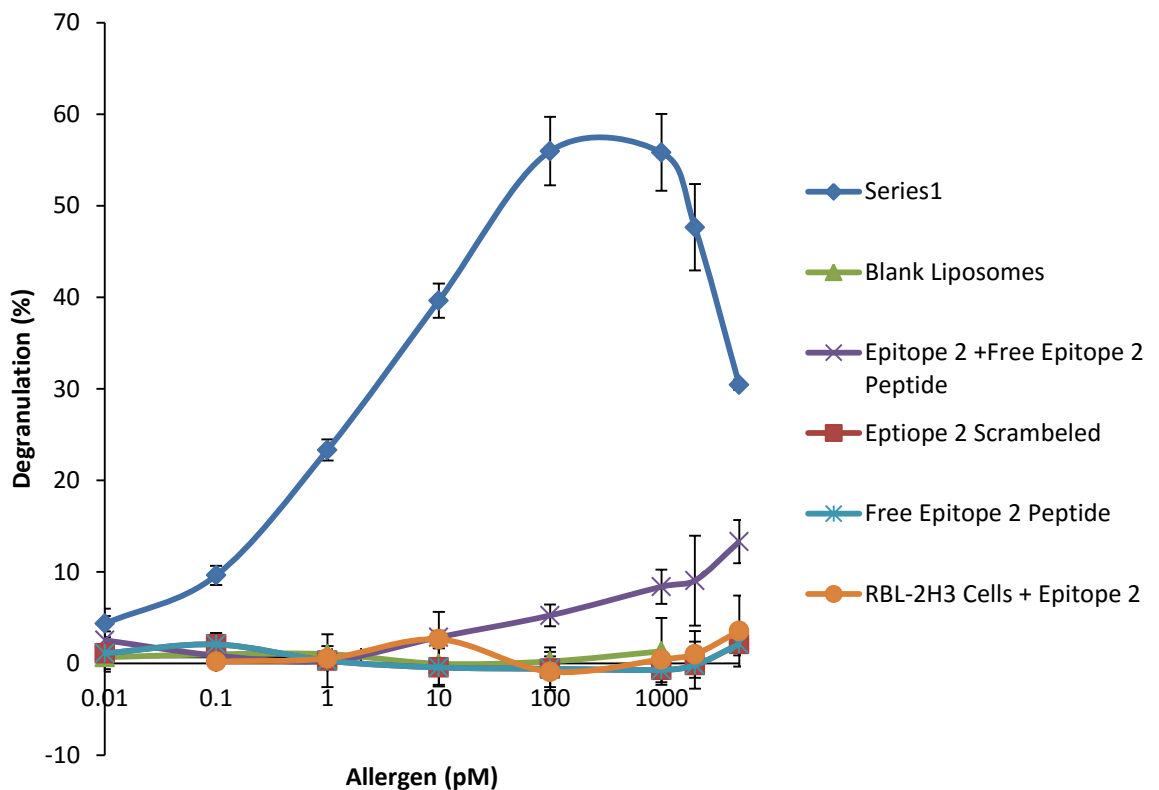

Figure S-4. Nanoallergens demonstrate specificity, as their degranulation response with RBL-SX38 cells can be prevented with addition of 100  $\mu$ M of free peptide 2 (in purple). Likewise, blank liposomes (in green), liposomes loaded with 2% of epitope 2 sequence that was scrambled (in red) and free epitope 2 alone (in light blue) do not cause a degranulation response. Likewise, cells not expressing the human Fc $\epsilon$ RI (RBL-2H3 cells) do not demonstrate degranulation when primed with patient serum 1 and incubated with 2% loaded epitope 2 nanoallergens.



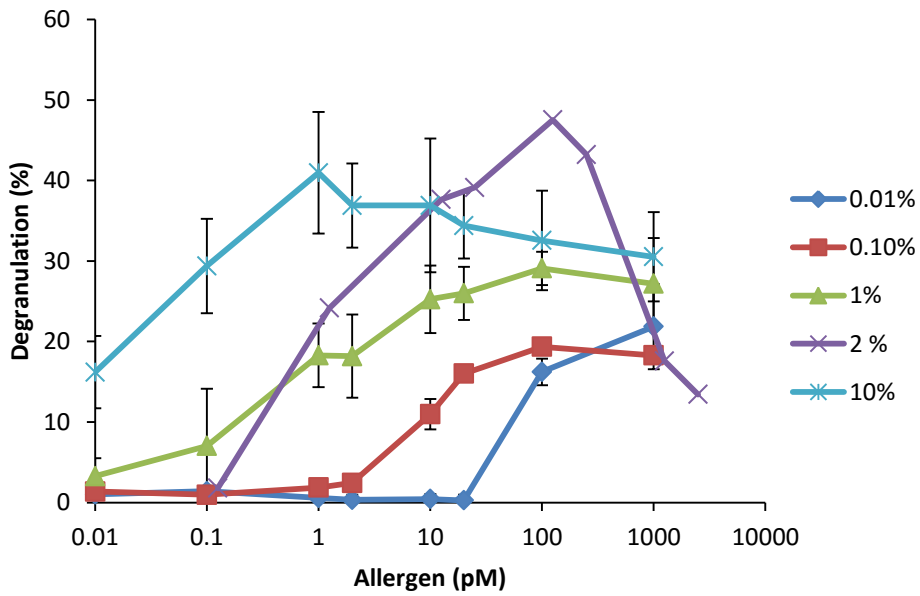

Figure S-5. Nanoallergens can be formed with various epitope loading of epitope 2 and used to trigger degranulation of RBL cells primed with 10% serum 1.

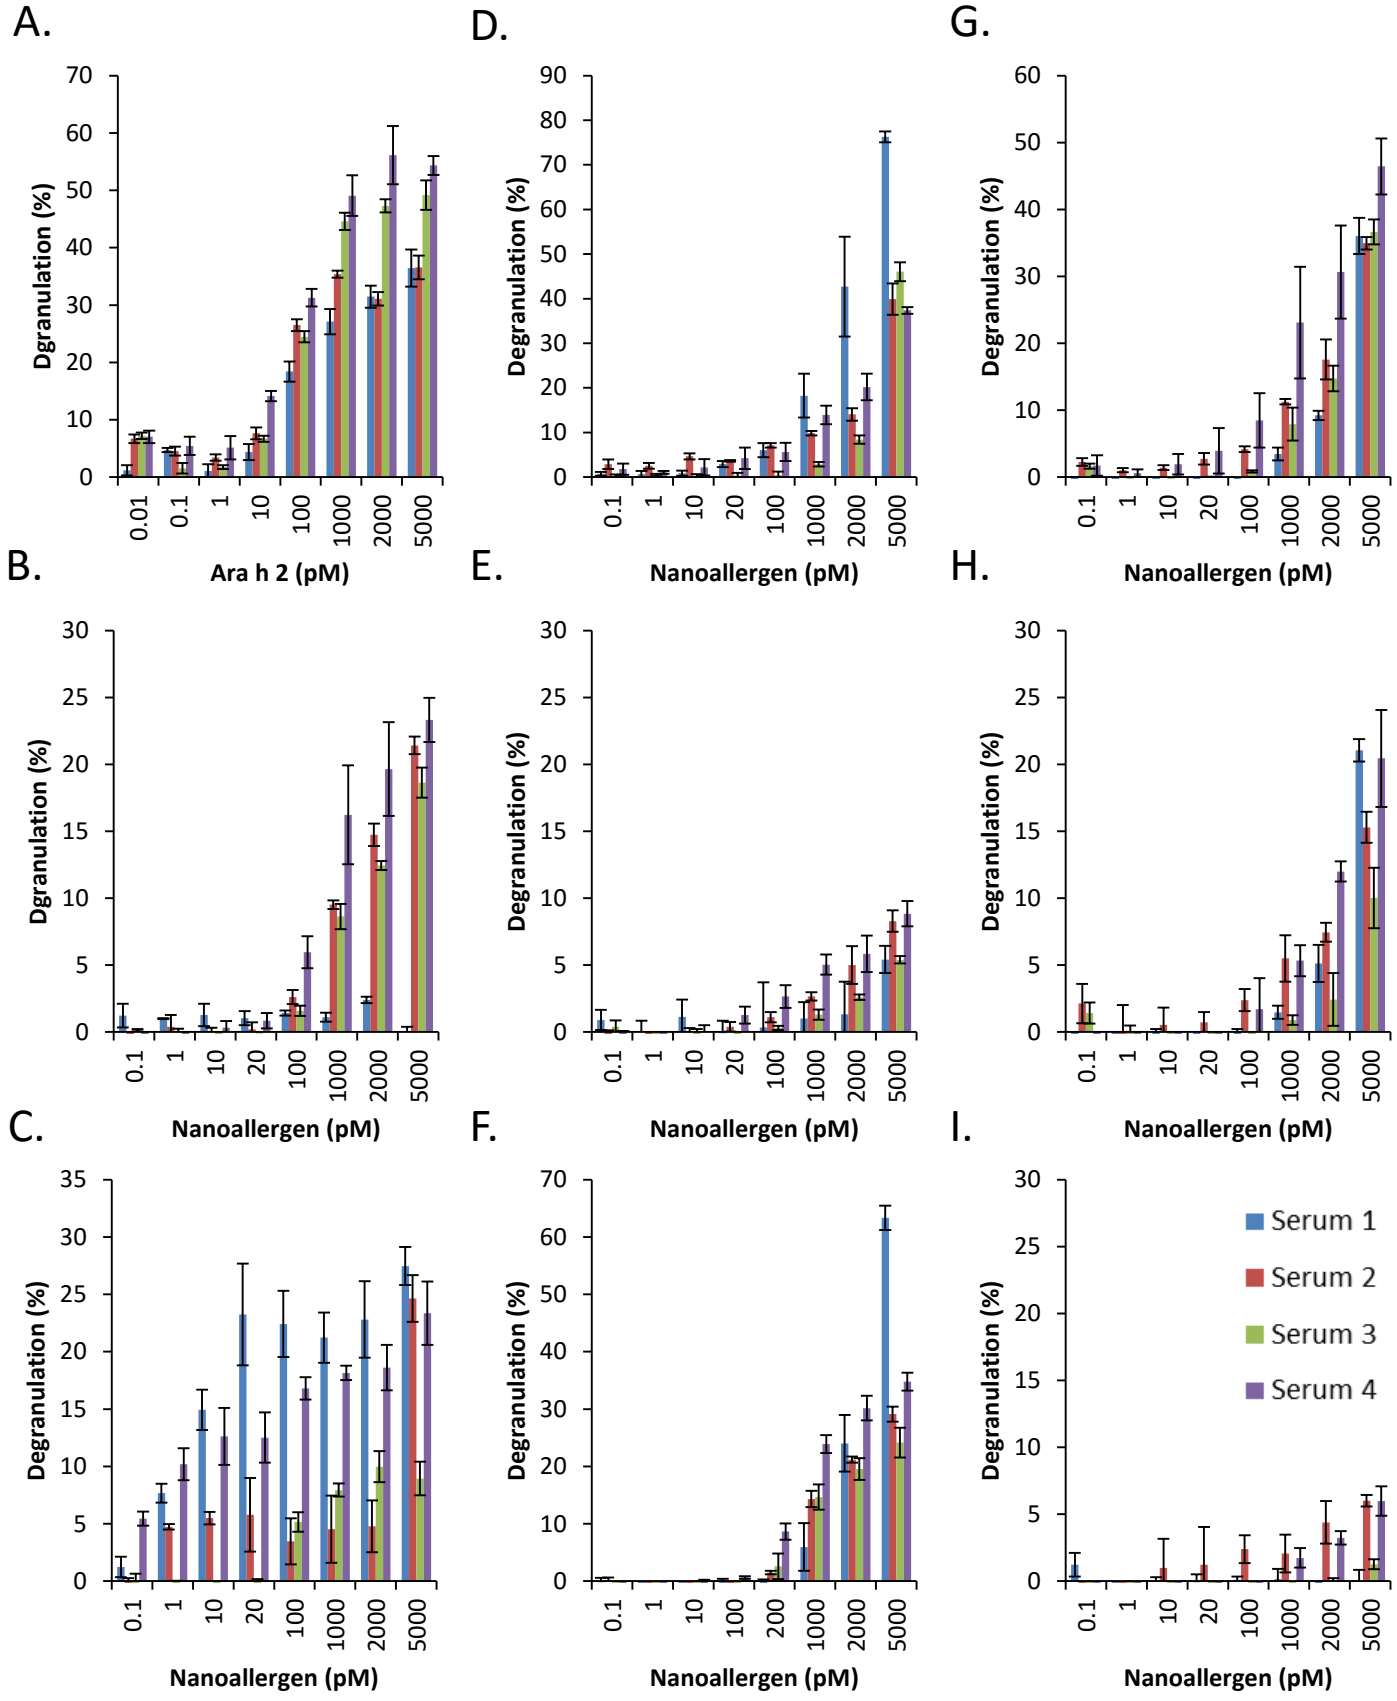

Figure S-6. Raw data for all patient sera/epitope combinations for Ara h 2. Note that 2% epitope loading was used for all assays. (A) is for Ara h 2 protein, while B-I demonstrate epitope 1-8 respectively.

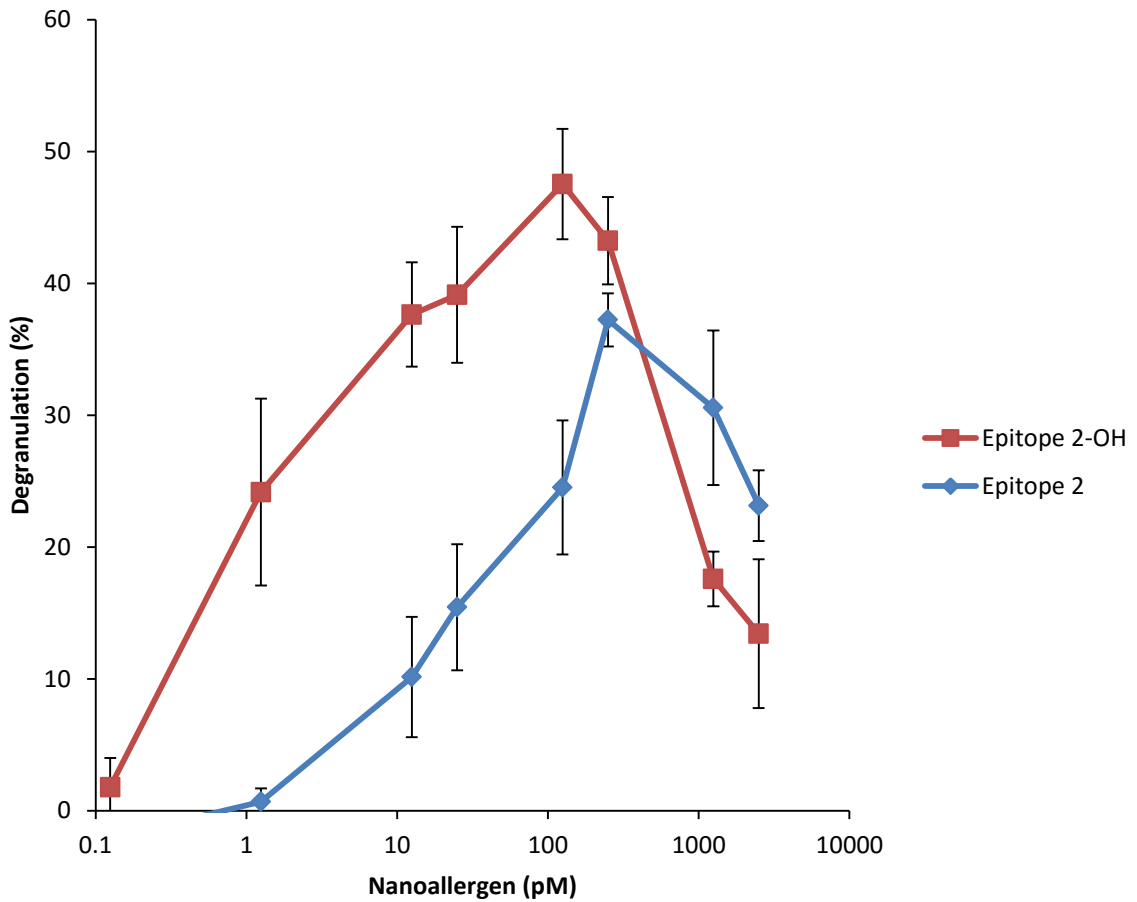

Figure S-7. Epitope peptide 2 demonstrates an increase in response when proline hydroxylations are present. Epitope 2- lipid conjugate was made with and without the addition of proline hydroxylations and loaded at 2% in nanoallergens. Epitope 2,  $EC_{50} = 21.5 \pm 8.8$  pM; Epitope 2<sup>OH</sup>,  $EC_{50} = 0.75 \pm 1.5$  pM ;  $p < 0.01$

A.

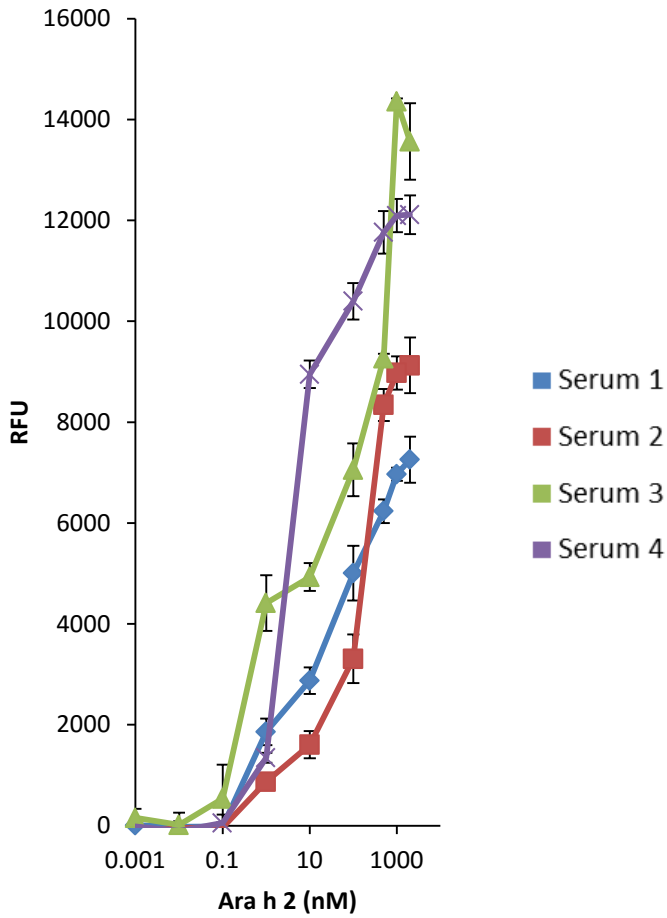

B.

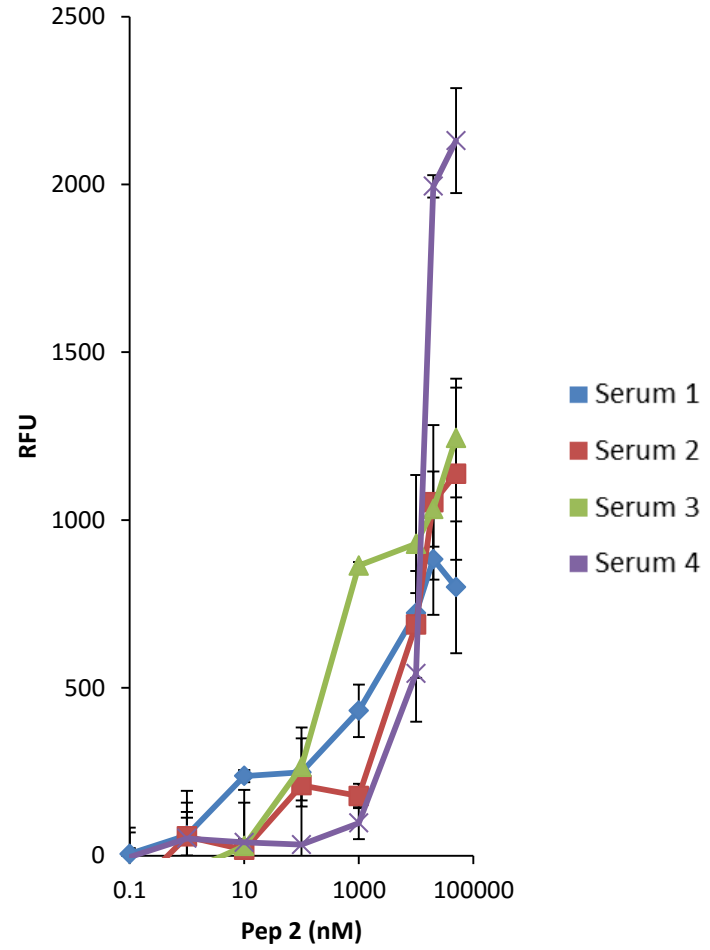

Figure S-8. ELISA binding data for additional sera. (A) Ara h 2 or (B) free epitope peptide 2 was used to bind patient IgE's.

Table S-4: Ara h 6 Epitopes

| Epitope# | Sequence       | Number  | Notes                         |
|----------|----------------|---------|-------------------------------|
| 1        | MRRERGRGGDSSSS | 24-37   |                               |
| 2        | KPCEQHIMQRI    | 45-55   | Homology to ara h2 epitope 11 |
| 3        | YDSYDIR        | 35-68   | similar to ara h2 epitope 2   |
| 4        | CDELNEMENTQR   | 82-93   | Homology to ara h2 epitope 10 |
| 5        | CEALQQIMENQCD  | 97-109  |                               |
| 6        | KRELRLPQQ      | 120-129 | Homology to ara h2 epitope 7  |
| 7        | CNFRAPQRCDLDV  | 130-142 | Homology to ara h2 epitope 8  |

Table S-5. Listing of Ara h 6 IgE binding epitopes-lipid conjugates taken from Ostu *et al.*<sup>18</sup>

| Epitope-Lipid | Exact Mass (g/mol) | Purity (%) | Immuno-reactivity (Serum 1) |
|---------------|--------------------|------------|-----------------------------|
| 1             | 3947.37            | >95%       | Moderate                    |
| 2             | 3733.34            | >95%       | Mild                        |
| 3             | 3110.93            | >95%       | High                        |
| 4             | 3804.23            | >95%       | Mild                        |
| 5             | 3832.45            | >95%       | Mild                        |
| 6             | 3665.35            | >95%       | Low                         |
| 7             | 3728.33            | >95%       | Mild                        |

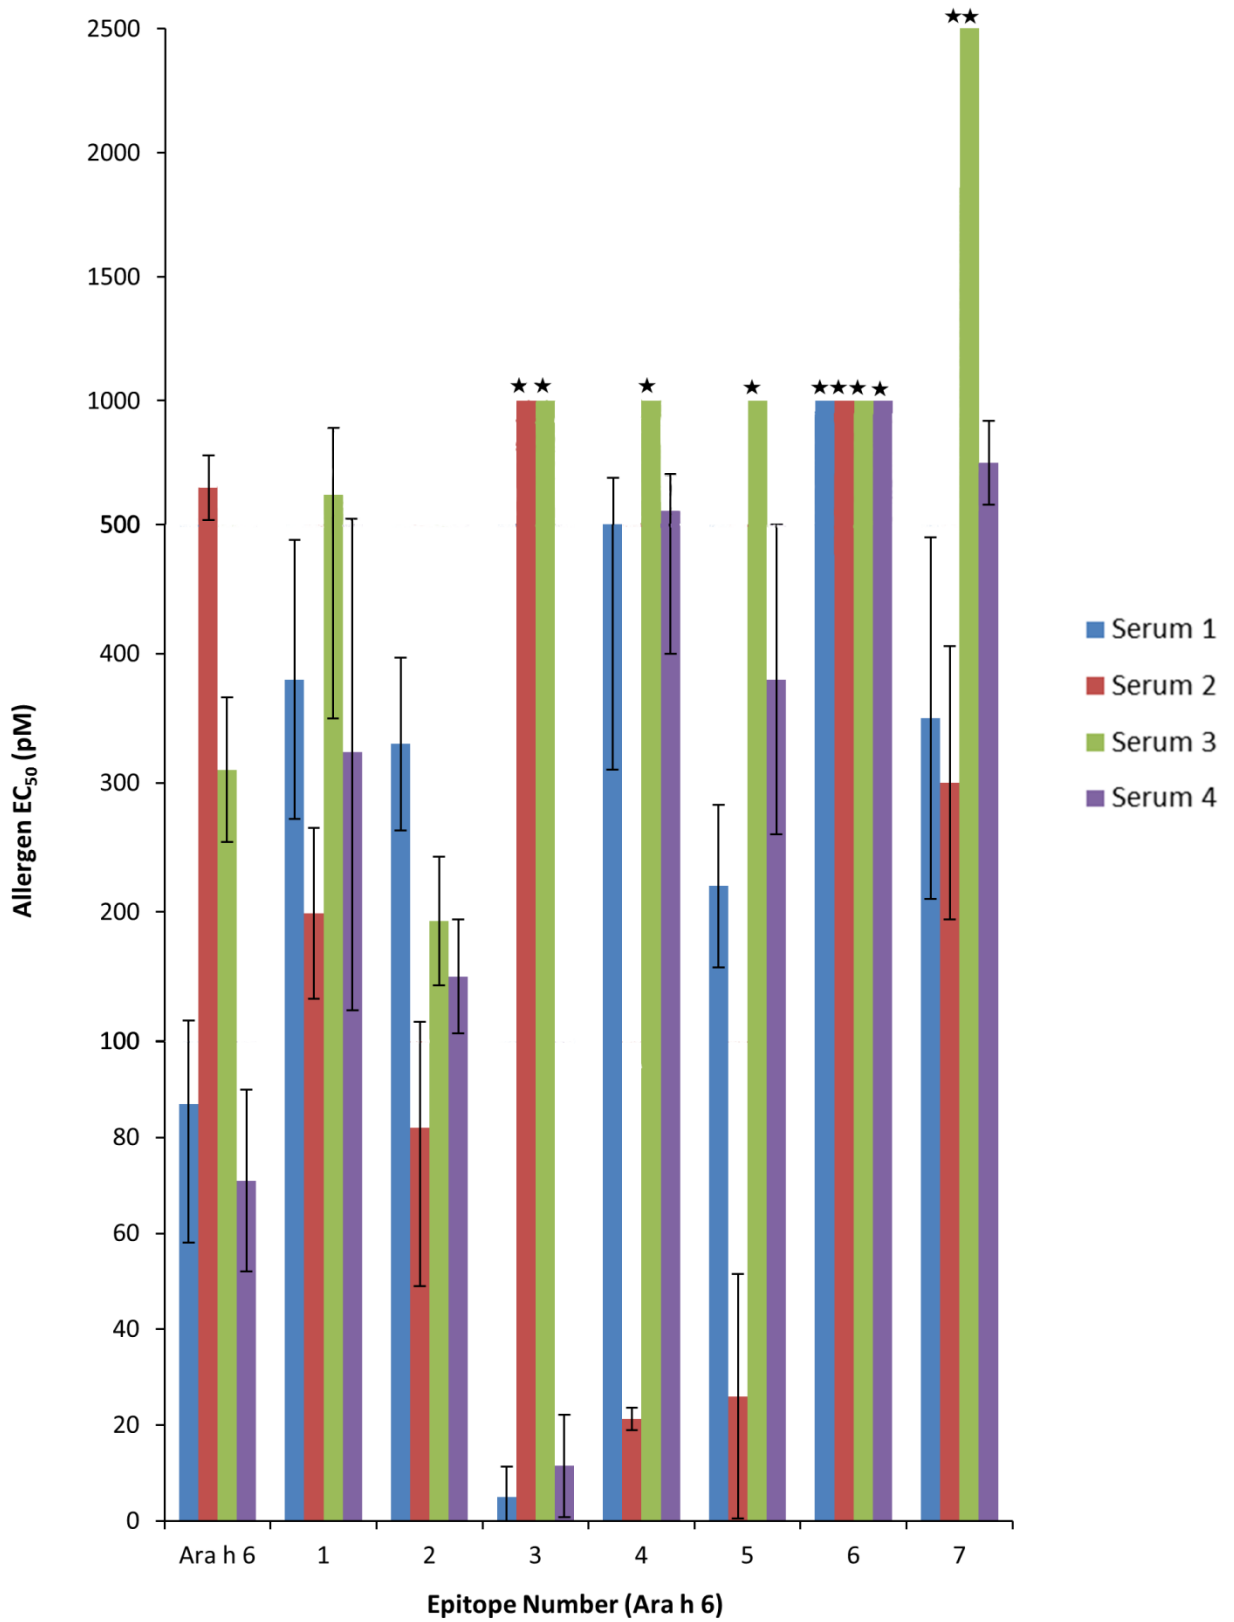

Figure S-9. EC<sub>50</sub> data for all patient sera/epitope combinations for Ara h 6. Note that 2 % epitope loading was used for all assays.

Table S-6- EC<sub>50</sub> values and maximum degranulation values for Ara h 6 and 2 % loaded Ara h 6 epitope nanoallergens

| Serum #   | 1                     |       |        |       | 2                     |      |        |       | 3                     |       |        |       | 4                     |       |        |       |
|-----------|-----------------------|-------|--------|-------|-----------------------|------|--------|-------|-----------------------|-------|--------|-------|-----------------------|-------|--------|-------|
| Peptide # | EC <sub>50</sub> (pM) | Error | Max(%) | Error | EC <sub>50</sub> (pM) |      | Max(%) | Error | EC <sub>50</sub> (pM) | Error | Max(%) | Error | EC <sub>50</sub> (pM) | Error | Max(%) | Error |
| Arah6     | 87                    | 29    | 80     | 5.5   | 650                   | 130  | 73     | 5     | 310                   | 56    | 61     | 3     | 71                    | 19    | 91     | 5     |
| 1         | 380                   | 108   | 50     | 4     | 199                   | 66   | 60     | 4.2   | 620                   | 270   | 38     | 4.8   | 324                   | 200   | 52     | 8.8   |
| 2         | 330                   | 67    | 73     | 3.1   | 82                    | 33   | 78     | 6.2   | 193                   | 50    | 62     | 3.6   | 150                   | 44    | 70     | 4.2   |
| 3         | 5                     | 6.4   | 50     | 7.1   | >1000                 |      | 42.3   | 4.3   | >1000                 |       | 40.7   | 2.3   | 11.5                  | 10.7  | 47     | 6.32  |
| 4         | 500                   | 190   | 25.8   | 2.1   | 21.3                  | 2.3  | 9.6    | 0.26  | >1000                 |       | 11.3   | 1.2   | 550                   | 150   | 36.2   | 2.5   |
| 5         | 220                   | 63    | 18.8   | 4.43  | 26                    | 25.5 | 13     | 2     | >1000                 |       | 8.9    | 0.8   | 380                   | 120   | 31.7   | 2.6   |
| 6         | >1000                 |       | 30.8   | 3.8   | >1000                 |      | 33.5   | 4.7   | >1000                 |       | 17.1   | 6.5   | >1000                 |       | 18.8   | 2.5   |
